# Supplementary material for: Lifestyle Changes in Relation to Initiation of Antihypertensive and Lipid‐Lowering Medication: A Cohort Study
Source: PubMed Central journal article supplement — J Am Heart Assoc. 2020 Feb 5;9(4):e014168. doi: 10.1161/JAHA.119.014168 (PMC7070189; doi:10.1161/jaha.119.014168), 2020-02-05
Supplement: JAH3-9-e014168-s001.pdf [file JAH3-9-e014168-s001.pdf]

**Table S1. Cross-tabulation of unhealthy lifestyle factors at baseline and during the second survey wave by use of preventive medication.**

| Baseline (wave 1)                          | Second survey (wave 2) |               |                |               |                |               |
|--------------------------------------------|------------------------|---------------|----------------|---------------|----------------|---------------|
|                                            | Initiators             |               | Prevalent user |               | Non-initiators |               |
|                                            | Yes<br>No. (%)         | No<br>No. (%) | Yes<br>No. (%) | No<br>No. (%) | Yes<br>No. (%) | No<br>No. (%) |
| <b>Obesity</b>                             |                        |               |                |               |                |               |
| Yes                                        | 1252 (86.2)            | 200 (13.8)    | 4935 (86.1)    | 792 (13.8)    | 3326 (82.4)    | 712 (17.6)    |
| No                                         | 503 (7.2)              | 6470 (92.8)   | 1365 (7.0)     | 18 256 (93.0) | 1574 (3.9)     | 38 479 (96.1) |
| Total                                      | 1755 (20.8)            | 6670 (79.2)   | 6300 (24.9)    | 19 048 (75.2) | 4900 (11.1)    | 39 191 (88.9) |
| <i>P</i> value *                           | <.001                  |               | <.001          |               | <.001          |               |
| <b>Physical inactivity</b>                 |                        |               |                |               |                |               |
| Yes                                        | 1355 (55.4)            | 1093 (44.7)   | 4715(58.2)     | 3390 (41.8)   | 4929 (49.6)    | 5001 (50.4)   |
| No                                         | 1193 (19.2)            | 5017 (80.8)   | 3853 (21.1)    | 14 410 (78.9) | 5334 (15.1)    | 30 048 (84.9) |
| Total                                      | 2548 (29.4)            | 6110 (70.6)   | 8568 (32.5)    | 17 800 (67.5) | 10 263 (22.7)  | 35 049 (77.4) |
| <i>P</i> value *                           | .04                    |               | <.001          |               | <.001          |               |
| <b>High alcohol consumption</b>            |                        |               |                |               |                |               |
| Yes                                        | 769 (59.2)             | 527 (40.7)    | 2180 (58.3)    | 1557 (41.7)   | 3375 (58.4)    | 2406 (41.6)   |
| No                                         | 460 (6.20)             | 6965 (93.8)   | 1390 (6.09)    | 21 420 (93.9) | 2354 (5.93)    | 37 355 (94.1) |
| Total                                      | 1229 (14.1)            | 7492 (85.9)   | 3570 (13.5)    | 22 977 (86.6) | 5729 (12.6)    | 39 761 (87.4) |
| <i>P</i> value *                           | .03                    |               | .002           |               | .45            |               |
| <b>Current smoking</b>                     |                        |               |                |               |                |               |
| Yes                                        | 887 (71.7)             | 351 (28.4)    | 2263 (75.7)    | 725 (24.3)    | 4575 (77.7)    | 1317 (22.4)   |
| No                                         | 121 (1.7)              | 7076 (98.3)   | 353 (1.54)     | 22 449 (99.5) | 636 (1.67)     | 37 501 (98.3) |
| Total                                      | 1008 (12.0)            | 7427 (88.1)   | 2616 (10.1)    | 23 224 (89.9) | 5211 (11.8)    | 38 818 (88.2) |
| <i>P</i> value *                           | <.001                  |               | <.001          |               | <.001          |               |
| <b>Cluster of 3–4 unhealthy lifestyles</b> |                        |               |                |               |                |               |
| Yes                                        | 145 (45.2)             | 176 (54.8)    | 486 (46.6)     | 556 (53.4)    | 359 (39.5)     | 551 (60.6)    |
| No                                         | 186 (2.2)              | 8288 (97.8)   | 604 (2.4)      | 25 126 (97.7) | 601 (1.3)      | 44 387 (98.7) |
| Total                                      | 331 (3.8)              | 8464 (96.2)   | 1090 (4.1)     | 25 682 (95.9) | 960 (2.1)      | 44 938 (97.9) |
| <i>P</i> value *                           | .53                    |               | .16            |               | .14            |               |

Total number of participant-observations (% of those with data at baseline) who had data available on body mass index at both surveys 77 864 (97.5%), on physical activity 80 338 (99.2%), on alcohol consumption 80 758 (99.4%), and on smoking 78 304 (98.3%).

\* *P* values for test of pre-post change derived from McNemar's test. *P* values reported here do not take into account that each participant may have contributed to more than one dataset.

**Table S2. Changes in body mass index, physical activity and alcohol consumption from the baseline survey to the second survey wave among users of preventive medication versus non-initiators. Those with cardiovascular disease or diabetes prior to the second survey excluded.**

| Lifestyle factor/<br>User group              | Outcome     |                        | Mean change<br>( <i>P</i> value*) | $\beta$ value (95% CI)             |                                  |
|----------------------------------------------|-------------|------------------------|-----------------------------------|------------------------------------|----------------------------------|
|                                              | Mean (SD)   |                        |                                   | Unadjusted difference <sup>†</sup> | Adjusted difference <sup>‡</sup> |
|                                              | Baseline    | 2 <sup>nd</sup> survey |                                   |                                    |                                  |
| <b>Body mass index (kg/m<sup>2</sup>)</b>    |             |                        |                                   |                                    |                                  |
| Initiators<br>(n=7645)                       | 26.1 (4.02) | 26.6 (4.30)            | 0.55<br>( <i>&lt;.001</i> )       | 0.16 (0.13–0.20)                   | 0.21 (0.18–0.24)                 |
| Prevalent users<br>(n=22 380)                | 26.6 (4.33) | 27.0 (4.52)            | 0.36<br>( <i>&lt;.001</i> )       | -0.01 (-0.03–0.01)                 | 0.10 (0.08–0.12)                 |
| Non-initiators<br>(n=43 616)                 | 24.8 (3.66) | 25.2 (3.84)            | 0.38<br>( <i>&lt;.001</i> )       | Reference                          | Reference                        |
| <b>Physical activity (MET-hours/day)</b>     |             |                        |                                   |                                    |                                  |
| Initiators<br>(n=7851)                       | 4.15 (3.72) | 4.00 (3.60)            | -0.14<br>( <i>&lt;.001</i> )      | -0.10 (-0.18–0.03)                 | -0.09 (-0.15–[-0.02])            |
| Prevalent users<br>(n=23 229)                | 3.89 (3.48) | 3.79 (2.89)            | -0.10<br>( <i>&lt;.001</i> )      | -0.12 (-0.17–[-0.08])              | -0.09 (-0.14–[-0.04])            |
| Non-initiators<br>(n=44 809)                 | 4.70 (4.01) | 4.69 (4.03)            | -0.01<br>(.54)                    | Reference                          | Reference                        |
| <b>Alcohol consumption (grams/week)</b>      |             |                        |                                   |                                    |                                  |
| Initiators<br>(n=7907)                       | 68.2 (107)  | 65.8 (109)             | -2.41<br>(.02)                    | -2.35 (-4.09–[-0.62])              | -2.00 (-3.76–[-0.23])            |
| Prevalent users<br>(n=23 386)                | 65.4 (106)  | 63.2 (108)             | -2.23<br>( <i>&lt;.001</i> )      | -1.67 (-2.83–[-0.52])              | -0.86 (-2.08–0.37)               |
| Non-initiators<br>(n=44 986)                 | 61.0 (93.0) | 60.6 (95.6)            | -0.38<br>(0.32)                   | Reference                          | Reference                        |
| <b>Number of cigarettes /day<sup>¶</sup></b> |             |                        |                                   |                                    |                                  |
| Initiators<br>(n=763)                        | 12.7 (6.70) | 12.2 (6.66)            | -0.46<br>(0.003)                  | -0.28 (-0.54–[-0.02])              | -0.23 (-0.49–0.03)               |
| Prevalent users<br>(n=1938)                  | 12.0 (6.61) | 11.8 (6.47)            | -0.21<br>(0.03)                   | 0.0002 (-0.18–0.18)                | 0.09 (-0.09–0.28)                |
| Non-initiators<br>(n=4468)                   | 11.9 (6.57) | 11.7 (6.44)            | -0.20<br>(0.002)                  | Reference                          | Reference                        |

CI=confidence interval, MET=metabolic equivalent of task, SD=standard deviation.

\*SDs and *P* values reported here do not take into account that each participant may have contributed to more than one dataset.

<sup>†</sup>adjusted for baseline year and time interval between the survey waves.

<sup>‡</sup>adjusted for baseline year, time interval, age, sex, marital, occupational, and employment status, smoking status and other lifestyle factors at baseline.

<sup>¶</sup>among those who were current smokers at both waves.

**Table S3. Odds ratios for obesity, physical inactivity, high alcohol consumption, and current smoking at the second survey wave for users of preventive medication (versus non-initiators) stratified by presence of the respective unhealthy lifestyle at baseline. Those with cardiovascular disease or diabetes prior to the second survey excluded.**

| Baseline<br>(wave 1)                       | Initiators                |                                      | Prevalent users                        |                                      | Non-<br>initiators |
|--------------------------------------------|---------------------------|--------------------------------------|----------------------------------------|--------------------------------------|--------------------|
|                                            | Unadjusted<br>OR (95% CI) | Adjusted <sup>†</sup><br>OR (95% CI) | Unadjusted <sup>†</sup><br>OR (95% CI) | Adjusted <sup>†</sup><br>OR (95% CI) | Ref.               |
| <b>Obesity</b>                             |                           |                                      |                                        |                                      |                    |
| Yes                                        | 1.47 (1.20–1.80)          | 1.50 (1.22–1.83)                     | 1.29 (1.14–1.46)                       | 1.35 (1.18–1.55)                     | 1.00               |
| No                                         | 1.82 (1.64–2.03)          | 1.82 (1.63–2.02)                     | 1.69 (1.56–1.83)                       | 1.79 (1.64–1.95)                     | 1.00               |
| <b>Physical inactivity</b>                 |                           |                                      |                                        |                                      |                    |
| Yes                                        | 1.23 (1.12–1.37)          | 1.13 (1.02–1.26)                     | 1.34 (1.26–1.42)                       | 1.20 (1.12–1.29)                     | 1.00               |
| No                                         | 1.22 (1.13–1.32)          | 1.07 (0.99–1.16)                     | 1.42 (1.36–1.49)                       | 1.18 (1.13–1.24)                     | 1.00               |
| <b>High alcohol consumption</b>            |                           |                                      |                                        |                                      |                    |
| Yes                                        | 1.05 (0.92–1.20)          | 1.07 (0.93–1.22)                     | 1.03 (0.94–1.13)                       | 1.05 (0.95–1.15)                     | 1.00               |
| No                                         | 1.03 (0.92–1.16)          | 1.08 (0.96–1.21)                     | 1.03 (0.96–1.11)                       | 1.18 (1.09–1.28)                     | 1.00               |
| <b>Current smoking</b>                     |                           |                                      |                                        |                                      |                    |
| Yes                                        | 0.77 (0.66–0.89)          | 0.76 (0.65–0.90)                     | 0.98 (0.87–1.10)                       | 0.97 (0.86–1.09)                     | 1.00               |
| No                                         | 0.98 (0.79–1.22)          | 1.00 (0.80–1.25)                     | 0.93 (0.81–1.08)                       | 1.11 (0.95–1.30)                     | 1.00               |
| <b>Cluster of 3–4 unhealthy lifestyles</b> |                           |                                      |                                        |                                      |                    |
| Yes                                        | 1.27 (0.95–1.70)          | 1.31 (0.98–1.75)                     | 1.22 (1.00–1.48)                       | 1.32 (1.07–1.62)                     | 1.00               |
| No                                         | 1.57 (1.30–1.90)          | 1.67 (1.38–2.03)                     | 1.64 (1.44–1.87)                       | 1.95 (1.71–2.23)                     | 1.00               |

CI=confidence interval, OR=odds ratio.

\* adjusted for baseline year and time interval between the survey waves.

† adjusted for baseline year, time interval, age, sex, marital, occupational, and employment status, and other lifestyle factors at baseline (except for the cluster variable).

**Table S4. Changes in body mass index, physical activity, and alcohol consumption from the baseline survey to the second survey wave among initiators with at least 1 refill of preventive medication versus non-initiators.**

| Lifestyle factor/<br>User group                                                  | Outcome     |                        | Mean change<br>( <i>P</i> value <sup>*</sup> ) | $\beta$ value (95% CI)<br>Unadjusted difference <sup>†</sup> | Adjusted difference <sup>‡</sup> |
|----------------------------------------------------------------------------------|-------------|------------------------|------------------------------------------------|--------------------------------------------------------------|----------------------------------|
|                                                                                  | Mean (SD)   | 2 <sup>nd</sup> survey |                                                |                                                              |                                  |
| <b>Body mass index (kg/m<sup>2</sup>)</b>                                        |             |                        |                                                |                                                              |                                  |
| <i>Initiators with 1+ refills during the first year</i><br>(n=6729)              | 26.5 (4.21) | 27.0 (4.47)            | 0.53 (<.001)                                   | 0.13 (0.10–0.17)                                             | 0.20 (0.16–0.24)                 |
| <i>Initiators with 2+ refills during the first year</i> <sup>§</sup><br>(n=5934) | 26.6 (4.23) | 27.1 (4.49)            | 0.53 (<.001)                                   | 0.13 (0.09–0.17)                                             | 0.20 (0.16–0.24)                 |
| <i>Non-initiators</i><br>(n=44 091)                                              | 24.9 (3.69) | 25.2 (3.86)            | 0.37 (<.001)                                   | Reference                                                    | Reference                        |
| <b>Physical activity (MET-hours/day)</b>                                         |             |                        |                                                |                                                              |                                  |
| <i>Initiators with 1+ refills during the first year</i><br>(n=6923)              | 4.07 (3.73) | 3.89 (3.55)            | -0.18 (<.001)                                  | -0.12 (-0.20–[-0.05])                                        | -0.09 (-0.17–[-0.01])            |
| <i>Initiators with 2+ refills during the first year</i> <sup>§</sup><br>(n=6106) | 4.03 (3.69) | 3.85 (3.48)            | -0.19 (<.001)                                  | -0.12 (-0.19–[-0.04])                                        | -0.08 (-0.16–[-0.002])           |
| <i>Non-initiators</i><br>(n=45 312)                                              | 4.69 (4.01) | 4.68 (4.03)            | -0.01 (.47)                                    | Reference                                                    | Reference                        |
| <b>Alcohol consumption (grams/week)</b>                                          |             |                        |                                                |                                                              |                                  |
| <i>Initiators with 1+ refills during the first year</i><br>(n=6975)              | 70.9 (113)  | 68.0 (114)             | -2.89 (.01)                                    | -2.42 (-4.14–[-0.70])                                        | -1.93 (-3.74–[-0.12])            |
| <i>Initiators with 2+ refills during the first year</i> <sup>§</sup><br>(n=6149) | 71.4 (112)  | 68.2 (116)             | -3.17 (.01)                                    | -3.13 (-5.20–[-1.06])                                        | -2.27 (-4.41–[-0.14])            |
| <i>Non-initiators</i><br>(n=45 488)                                              | 61.1 (93.2) | 60.6 (95.6)            | -0.44 (.26)                                    | Reference                                                    | Reference                        |

CI=confidence interval, MET=metabolic equivalent of task, SD=standard deviation.

<sup>\*</sup>SDs and *P* values reported here do not take into account that each participant may have contributed to more than one dataset. <sup>†</sup>adjusted for baseline year and time interval between the survey waves.

<sup>‡</sup>adjusted for baseline year, time interval, age, sex, marital, occupational, and employment status, smoking status and other lifestyle factors at baseline.

<sup>§</sup>According to the Finnish reimbursement rules, medications can be reimbursed for a maximum of 3 month-period at one transaction. Initial fill and 2 refills with a 3-month supply each would lead to 80+% adherence level during the first year.

**Table S5. Odds ratios for obesity, physical inactivity, high alcohol consumption, and current smoking at the second survey wave for initiators of preventive medication with at least 1 refill (versus non-initiators) stratified by presence of the respective unhealthy lifestyle at baseline.**

| Baseline<br>(wave 1)                       | Initiators                              |                                      |                                                     |                                      |
|--------------------------------------------|-----------------------------------------|--------------------------------------|-----------------------------------------------------|--------------------------------------|
|                                            | <i>1+ refills during the first year</i> |                                      | <i>2+ refills during the first year<sup>‡</sup></i> |                                      |
|                                            | Unadjusted <sup>*</sup><br>OR (95% CI)  | Adjusted <sup>†</sup><br>OR (95% CI) | Unadjusted <sup>*</sup><br>OR (95% CI)              | Adjusted <sup>†</sup><br>OR (95% CI) |
| <b>Obesity</b>                             |                                         |                                      |                                                     |                                      |
| Yes                                        | 1.43 (1.17–1.73)                        | 1.46 (1.20–1.79)                     | 1.39 (1.13–1.70)                                    | 1.42 (1.16–1.75)                     |
| No                                         | 1.93 (1.72–2.16)                        | 1.93 (1.72–2.16)                     | 1.96 (1.72–2.23)                                    | 1.95 (1.71–2.22)                     |
| <b>Physical inactivity</b>                 |                                         |                                      |                                                     |                                      |
| Yes                                        | 1.30 (1.17–1.43)                        | 1.15 (1.03–1.27)                     | 1.33 (1.20–1.47)                                    | 1.17 (1.05–1.30)                     |
| No                                         | 1.34 (1.23–1.45)                        | 1.10 (1.02–1.20)                     | 1.37 (1.25–1.48)                                    | 1.11 (1.02–1.21)                     |
| <b>High alcohol consumption</b>            |                                         |                                      |                                                     |                                      |
| Yes                                        | 1.01 (0.88–1.15)                        | 1.00 (0.86–1.14)                     | 0.99 (0.86–1.14)                                    | 0.98 (0.84–1.13)                     |
| No                                         | 1.07 (0.95–1.21)                        | 1.12 (0.98–1.27)                     | 1.04 (0.93–1.18)                                    | 1.09 (0.96–1.23)                     |
| <b>Current smoking</b>                     |                                         |                                      |                                                     |                                      |
| Yes                                        | 0.73 (0.62–0.85)                        | 0.72 (0.61–0.84)                     | 0.72 (0.61–0.86)                                    | 0.71 (0.60–0.86)                     |
| No                                         | 0.96 (0.77–1.21)                        | 0.98 (0.79–1.23)                     | 1.01 (0.80–1.27)                                    | 1.02 (0.81–1.30)                     |
| <b>Cluster of 3–4 unhealthy lifestyles</b> |                                         |                                      |                                                     |                                      |
| Yes                                        | 1.42 (1.08–1.86)                        | 1.46 (1.11–1.92)                     | 1.31 (1.00–1.72)                                    | 1.34 (1.01–1.78)                     |
| No                                         | 1.68 (1.41–2.01)                        | 1.75 (1.45–2.10)                     | 1.71 (1.42–2.06)                                    | 1.78 (1.46–2.16)                     |

CI=confidence interval, OR=odds ratio.

<sup>\*</sup> adjusted for baseline year and time interval between the survey waves.

<sup>†</sup> adjusted for baseline year, time interval, age, sex, marital, occupational, and employment status, and other lifestyle factors at baseline (except for the cluster variable).

<sup>‡</sup> According to the Finnish reimbursement rules, medications can be reimbursed for a maximum of 3 month-period at one transaction. Initial fill and 2 refills with a 3-month supply each would lead to 80+% adherence level during the first year.

**Table S6. Odds ratios for obesity, physical inactivity, high alcohol consumption, and current smoking at the third survey wave for initiators of preventive medication (versus non-initiators) stratified by presence/absence of the respective unhealthy lifestyle at baseline and wave 2.**

| Both at waves 1 and 2                      | Unadjusted* OR (95% CI) | Adjusted† OR (95% CI) |
|--------------------------------------------|-------------------------|-----------------------|
| <b>Obesity</b>                             |                         |                       |
| Yes (n=2213; 1995 cases )                  | 1.23 (0.90–1.69)        | 1.22 (0.86–1.75)      |
| No (n=23 986; 963 cases)                   | 1.71 (1.46–2.01)        | 1.77 (1.50–2.10)      |
| <b>Physical inactivity</b>                 |                         |                       |
| Yes (n=3269, 428 cases)                    | 1.24 (1.03–1.50)        | 1.07 (0.87–1.30)      |
| No (n=18 880, 2291 cases)                  | 1.25 (1.12–1.40)        | 1.12 (0.99–1.25)      |
| <b>High alcohol consumption</b>            |                         |                       |
| Yes (n=2240, 1559 cases)                   | 1.04 (0.83–1.31)        | 1.04 (0.81–1.33)      |
| No (n=23 735, 1008 cases)                  | 1.04 (0.87–1.23)        | 1.05 (0.87–1.27)      |
| <b>Current smoking</b>                     |                         |                       |
| Yes (n=2825; 2184 cases)                   | 1.04 (0.82–1.31)        | 1.02 (0.80–1.31)      |
| No (n=23 734; 186 cases)                   | 0.99 (0.80–1.21)        | 1.06 (0.70–1.61)      |
| <b>Cluster of 3–4 unhealthy lifestyles</b> |                         |                       |
| Yes (n=273, 134 cases)                     | 0.76 (0.44–1.30)        | 0.66 (0.37–1.19)      |
| No (n=28 334, 317 cases )                  | 1.33 (0.99–1.78)        | 1.43 (1.07–1.92)      |

CI=confidence interval, OR=odds ratio.

\*adjusted for baseline year and time interval between the survey waves.

†adjusted for baseline year, time interval, age, sex, marital, occupational, and employment status, and other lifestyle factors at baseline (except for the cluster variable).

Total number of participant-observations and number of cases with unhealthy lifestyle at wave 3 in parentheses.

**Table S7. Changes in body mass index, physical activity, and alcohol consumption from the baseline survey to the second survey wave among users of antihypertensive medications and statins versus non-initiators.**

| Lifestyle factor<br>/User group           | Outcome               |                        | Mean<br>change<br>( <i>P</i> value*) | $\beta$ value (95% C)<br>Unadjusted<br>difference <sup>†</sup> | Adjusted<br>difference <sup>‡</sup> |
|-------------------------------------------|-----------------------|------------------------|--------------------------------------|----------------------------------------------------------------|-------------------------------------|
|                                           | Mean (SD)<br>Baseline | 2 <sup>nd</sup> survey |                                      |                                                                |                                     |
| <b>Antihypertensive medications</b>       |                       |                        |                                      |                                                                |                                     |
| <b>Body mass index (kg/m<sup>2</sup>)</b> |                       |                        |                                      |                                                                |                                     |
| Initiators<br>(n=7091)                    | 26.5 (4.30)           | 27.0 (4.54)            | 0.55<br>( <i>&lt;.001</i> )          | 0.17 (0.13–0.21)                                               | 0.20 (0.17–0.24)                    |
| Prevalent users<br>(n= 22 576)            | 27.1 (4.68)           | 27.4 (4.83)            | 0.33<br>( <i>&lt;.001</i> )          | -0.02 (-0.04–0.004)                                            | 0.08 (0.06–0.10)                    |
| Non-initiators<br>(n=48 197)              | 24.9 (3.70)           | 25.3 (3.87)            | 0.36<br>( <i>&lt;.001</i> )          | Reference                                                      | Reference                           |
| <b>Physical activity (MET-hours/day)</b>  |                       |                        |                                      |                                                                |                                     |
| Initiator<br>(n=7317)                     | 4.05 (3.67)           | 3.85 (3.53)            | -0.20<br>( <i>&lt;.001</i> )         | -0.15 (-0.23–[-0.08])                                          | -0.14 (-0.22–[-0.06])               |
| Prevalent users<br>(n=23 496)             | 3.76 (3.43)           | 3.66 (3.36)            | -0.10<br>( <i>&lt;.001</i> )         | -0.12 (-0.17–[-0.07])                                          | -0.10 (-0.15–[-0.05])               |
| Non-user<br>(n=49 525)                    | 4.64 (3.98)           | 4.63 (4.00)            | -0.01<br>(0.52)                      | Reference                                                      | Reference                           |
| <b>Alcohol consumption (grams/week)</b>   |                       |                        |                                      |                                                                |                                     |
| Initiators<br>(n=7366)                    | 69.9 (113)            | 66.7 (110)             | -3.13<br>(.004)                      | -2.73 (-4.58–[-0.88])                                          | -2.17 (-4.07–[-0.26])               |
| Prevalent users<br>(n=23 666)             | 66.1 (109)            | 63.7 (111)             | -2.47<br>( <i>&lt;.001</i> )         | -1.55 (-2.63 –[-0.47])                                         | -0.95 (-2.13–0.22)                  |
| Non-initiators<br>(n=49 723)              | 61.4 (93.4)           | 60.9 (97.3)            | -0.52<br>(.16)                       | Reference                                                      | Reference                           |
| <b>Statins</b>                            |                       |                        |                                      |                                                                |                                     |
| <b>Body mass index (kg/m<sup>2</sup>)</b> |                       |                        |                                      |                                                                |                                     |
| Initiators<br>(n=5457)                    | 27.1 (4.45)           | 27.5 (4.63)            | 0.40<br>( <i>&lt;.001</i> )          | -0.01 (-0.05–0.04)                                             | 0.09 (0.05–0.14)                    |
| Prevalent users<br>(n=7373)               | 27.6 (4.44)           | 27.6 (4.58)            | 0.18<br>( <i>&lt;.001</i> )          | -0.18 (-0.22–[-0.14])                                          | 0.001 (-0.04–0.04)                  |
| Non-initiators<br>(n=65 034)              | 25.4 (4.06)           | 25.8 (4.26)            | 0.40<br>( <i>&lt;.001</i> )          | Reference                                                      | Reference                           |
| <b>Physical activity (MET-hours/day)</b>  |                       |                        |                                      |                                                                |                                     |
| Initiators<br>(n=5610)                    | 3.74 (3.47)           | 3.65 (3.35)            | -0.09<br>(.06)                       | -0.02 (-0.10–0.06)                                             | 0.04 (-0.04–0.12)                   |
| Prevalent users<br>(n=7673)               | 3.60 (3.25)           | 3.56 (3.30)            | -0.03<br>(.41)                       | -0.03 (-0.09–0.03)                                             | 0.06 (-0.01–0.13)                   |
| Non-initiators<br>(n=67 055)              | 4.46 (3.90)           | 4.41 (3.88)            | -0.05<br>( <i>&lt;.001</i> )         | Reference                                                      | Reference                           |

*Continued*

| Lifestyle factor<br>/User group         | Outcome                 |                        | Mean<br>change<br>( <i>P</i> value <sup>•</sup> ) | $\beta$ value (95% C)<br>Unadjusted<br>difference <sup>†</sup> | Adjusted<br>difference <sup>‡</sup> |
|-----------------------------------------|-------------------------|------------------------|---------------------------------------------------|----------------------------------------------------------------|-------------------------------------|
|                                         | Mean (SD <sup>a</sup> ) |                        |                                                   |                                                                |                                     |
|                                         | Baseline                | 2 <sup>nd</sup> survey |                                                   |                                                                |                                     |
| <b>Alcohol consumption (grams/week)</b> |                         |                        |                                                   |                                                                |                                     |
| Initiators<br>(n=5649)                  | 69.7 (106)              | 66.4 (111)             | -3.32<br>(.01)                                    | -3.14 (-5.0–[-1.24])                                           | -2.38 (-4.33–[-0.43])               |
| Prevalent users<br>(n=7710)             | 68.4 (115)              | 65.3 (112)             | -3.13<br>(.01)                                    | -1.30 (-3.08–[0.48])                                           | 0.59 (-1.35–2.54)                   |
| Non-initiators<br>(n=67396)             | 62.5 (97.9)             | 61.5 (99.4)            | -0.96<br>(.004)                                   | Reference                                                      | Reference                           |

CI=confidence interval; MET=metabolic equivalent of task; SD=standard deviation.

<sup>a</sup>SDs and *P* values reported here do not take into account that each participant may have contributed to more than one dataset.

<sup>†</sup>adjusted for baseline year and time interval between the survey waves.

<sup>‡</sup>adjusted for baseline year, time interval, age, sex, marital, occupational and employment status, diabetes, prevalent use of other therapeutic class, smoking status and other lifestyle factors at baseline.

**Table S8. Odds ratios for obesity, physical inactivity, high alcohol consumption, and current smoking at the second survey wave for users of antihypertensive medications and statins (versus non-initiators) stratified by presence of the respective unhealthy lifestyle at baseline.**

| Baseline<br>(wave 1)                       | Initiators                             |                                      | Prevalent users                       |                                      | Non-<br>initiators |
|--------------------------------------------|----------------------------------------|--------------------------------------|---------------------------------------|--------------------------------------|--------------------|
|                                            | Unadjusted <sup>•</sup><br>OR (95% CI) | Adjusted <sup>†</sup><br>OR (95% CI) | Unadjusted <sup>•</sup><br>OR (95%CI) | Adjusted <sup>†</sup><br>OR (95% CI) | Ref.               |
| <b>Antihypertensive medication</b>         |                                        |                                      |                                       |                                      |                    |
| <b>Obesity</b>                             |                                        |                                      |                                       |                                      |                    |
| Yes                                        | 1.27 (1.06–1.52)                       | 1.28 (1.07–1.54)                     | 1.37 (1.22–1.53)                      | 1.38 (1.21–1.57)                     | 1.00               |
| No                                         | 1.94 (1.73–2.17)                       | 1.87 (1.67–2.10)                     | 1.86 (1.69–1.99)                      | 1.80 (1.65–1.96)                     | 1.00               |
| <b>Physical inactivity</b>                 |                                        |                                      |                                       |                                      |                    |
| Yes                                        | 1.34 (1.22–1.48)                       | 1.20 (1.09–1.33)                     | 1.43 (1.35–1.52)                      | 1.23 (1.15–1.31)                     | 1.00               |
| No                                         | 1.36 (1.26–1.48)                       | 1.14 (1.05–1.24)                     | 1.48 (1.41–1.55)                      | 1.18 (1.13–1.24)                     | 1.00               |
| <b>High alcohol consumption</b>            |                                        |                                      |                                       |                                      |                    |
| Yes                                        | 1.00 (0.87–1.15)                       | 0.99 (0.85–1.14)                     | 1.03 (0.94–1.12)                      | 1.06 (0.96–1.17)                     | 1.00               |
| No                                         | 1.05 (0.93 – 1.17)                     | 1.04 (0.91–1.18)                     | 1.04 (0.97–1.12)                      | 1.13 (1.04–1.23)                     | 1.00               |
| <b>Current smoking</b>                     |                                        |                                      |                                       |                                      |                    |
| Yes                                        | 0.76 (0.66–0.88)                       | 0.76 (0.65–0.89)                     | 0.98 (0.88–1.10)                      | 0.96 (0.85–1.07)                     | 1.00               |
| No                                         | 0.97 (0.76–1.24)                       | 0.96 (0.75–1.24)                     | 0.97 (0.85–1.10)                      | 1.14 (0.98–1.32)                     | 1.00               |
| <b>Cluster of 3–4 unhealthy lifestyles</b> |                                        |                                      |                                       |                                      |                    |
| Yes                                        | 1.26 (0.97–1.62)                       | 1.28 (0.98–1.68)                     | 1.35 (1.12–1.62)                      | 1.39 (1.14–1.70)                     | 1.00               |
| No                                         | 1.72 (1.43–2.07)                       | 1.73 (1.43–2.10)                     | 1.73 (1.53–1.96)                      | 1.86 (1.63–2.13)                     | 1.00               |
| <b>Statins</b>                             |                                        |                                      |                                       |                                      |                    |
| <b>Obesity</b>                             |                                        |                                      |                                       |                                      |                    |
| Yes                                        | 1.19 (0.98–1.44)                       | 1.16 (0.96–1.40)                     | 1.13 (0.98–1.32)                      | 1.09 (0.92–1.29)                     | 1.00               |
| No                                         | 1.48 (1.30–1.67)                       | 1.38 (1.21–1.57)                     | 1.46 (1.30–1.64)                      | 1.28 (1.13–1.45)                     | 1.00               |
| <b>Physical inactivity</b>                 |                                        |                                      |                                       |                                      |                    |
| Yes                                        | 1.27 (1.15–1.41)                       | 1.10 (0.99–1.22)                     | 1.32 (1.20–1.45)                      | 1.04 (0.94–1.15)                     | 1.00               |
| No                                         | 1.34 (1.23–1.45)                       | 1.04 (0.96–1.14)                     | 1.39 (1.30–1.49)                      | 1.02 (0.95–1.11)                     | 1.00               |
| <b>High alcohol consumption</b>            |                                        |                                      |                                       |                                      |                    |
| Yes                                        | 0.96 (0.83–1.12)                       | 0.93 (0.80–1.08)                     | 0.98 (0.86–1.12)                      | 0.92 (0.80–1.06)                     | 1.00               |
| No                                         | 0.92 (0.81–1.04)                       | 0.95 (0.84–1.09)                     | 0.88 (0.79–1.00)                      | 0.99 (0.87–1.13)                     | 1.00               |



| Baseline<br>(wave 1)                       | Initiators                             |                                      | Prevalent users                       |                                      | Non-<br>initiators<br>Ref. |
|--------------------------------------------|----------------------------------------|--------------------------------------|---------------------------------------|--------------------------------------|----------------------------|
|                                            | Unadjusted <sup>*</sup><br>OR (95% CI) | Adjusted <sup>b</sup><br>OR (95% CI) | Unadjusted <sup>*</sup><br>OR (95%CI) | Adjusted <sup>†</sup><br>OR (95% CI) |                            |
| <b>Current smoking</b>                     |                                        |                                      |                                       |                                      |                            |
| Yes                                        | 0.65 (0.55–0.77)                       | 0.63 (0.53–0.75)                     | 1.08 (0.91–1.28)                      | 1.08 (0.90–1.31)                     | 1.00                       |
| No                                         | 0.92 (0.71–1.19)                       | 1.01 (0.77–1.32)                     | 0.65 (0.52–0.82)                      | 0.87 (0.66–1.11)                     | 1.00                       |
| <b>Cluster of 3–4 unhealthy lifestyles</b> |                                        |                                      |                                       |                                      |                            |
| Yes                                        | 1.04 (0.78–1.37)                       | 1.00 (0.75–1.33)                     | 1.29 (1.00–1.66)                      | 1.13 (0.84–1.50)                     | 1.00                       |
| No                                         | 1.28 (1.05–1.56)                       | 1.13 (0.92–1.39)                     | 1.38 (1.16–1.63)                      | 1.22 (0.99–1.50)                     | 1.00                       |

OR=odds ratio; CI=confidence interval.

<sup>\*</sup> adjusted for baseline year and time interval between the surveys waves.

<sup>†</sup> adjusted for baseline year and time interval, age, sex, marital, occupational, and employment status, prevalent use of other therapeutic class, diabetes, and other lifestyle factors (except for the cluster variable) at baseline.

**Table S9. Baseline characteristics of the 81 772 participant-observations stratified by use of antihypertensive medications and statins.**

| Characteristics at baseline (wave 1)              | Antihypertensive medication |                            |                           | Statins             |                          |                           |
|---------------------------------------------------|-----------------------------|----------------------------|---------------------------|---------------------|--------------------------|---------------------------|
|                                                   | Initiators (n=7472)         | Prevalent users (n=23 992) | Non-initiators (n=50 308) | Initiators (n=5736) | Prevalent users (n=7829) | Non-initiators (n=68 207) |
| <b>Baseline year</b>                              |                             |                            |                           |                     |                          |                           |
| 2000/02                                           | 1947 (26.1)                 | 4571 (19.1)                | 14559 (28.9)              | 1431(25.0)          | 771(0.9)                 | 18875 (27.7)              |
| 2004/05                                           | 3129 (41.9)                 | 7552 (31.5)                | 16592 (33.0)              | 2431 (42.4)         | 2258 (28.8)              | 22584 (33.1)              |
| 2008/09                                           | 2396 (32.1)                 | 11 869(49.5)               | 19157 (38.1)              | 1874 (32.7)         | 4800 (61.3)              | 26748 (39.2)              |
| <b>Age, mean (SD), years</b>                      | 52.3 (6.72)                 | 54.8 (7.22)                | 50.9 (6.97)               | 54.8 (6.30)         | 58.3 (6.76)              | 51.3 (6.96)               |
| 40–49                                             | 2950 (39.5)                 | 6433 (26.8)                | 24694 (49.1)              | 1326 (23.1)         | 958 (12.2)               | 31793 (46.6)              |
| 50–59                                             | 3511 (47.0)                 | 11663 (48.6)               | 20028 (39.8)              | 3235 (56.4)         | 3581 (45.7)              | 28386 (41.6)              |
| 60–78                                             | 1011 (13.5)                 | 5896 (24.6)                | 5586 (11.1)               | 1175 (20.5)         | 3290 (42.0)              | 8028 (11.8)               |
| <b>Women</b>                                      | 6197 (82.9)                 | 20315 (84.7)               | 42104 (83.8)              | 4527 (78.9)         | 6101 (77.9)              | 57988 (85.0)              |
| <b>Married</b>                                    | 5623 (76.2)                 | 17870 (75.4)               | 38172 (76.7)              | 4346 (76.8)         | 5886 (76.2)              | 51433 (75.4)              |
| <b>Occupational status</b>                        |                             |                            |                           |                     |                          |                           |
| Upper-grade non-manual workers                    | 2165 (29.3)                 | 7232 (30.5)                | 16 561(33.2)              | 1710 (30.2)         | 2423 (31.4)              | 21825 (32.3)              |
| Lower-grade non-manual workers                    | 1979 (27.8)                 | 6157 (26.0)                | 13 295(26.7)              | 1303 (23.0)         | 1673 (21.7)              | 18455 (27.3)              |
| Clerks                                            | 529 (7.2)                   | 1997 (8.4)                 | 3448 (6.9)                | 455 (8.0)           | 612 (7.92)               | 4907 (7.3)                |
| Manual workers                                    | 2720 (36.8)                 | 8325 (35.1)                | 16535 (33.2)              | 2203 (38.9)         | 3016 (39.1)              | 22361 (33.1)              |
| <b>Employed</b>                                   | 6858 (91.9)                 | 19581 (81.8)               | 46549 (92.6)              | 5042 (88.0)         | 5287 (67.8)              | 62659 (92.0)              |
| <b>Body weight</b>                                |                             |                            |                           |                     |                          |                           |
| Normal                                            | 2999 (41.2)                 | 8543 (36.6)                | 28199 (57.2)              | 1991 (35.5)         | 2378 (31.1)              | 35372 (53.1)              |
| Overweight                                        | 2863 (39.3)                 | 9181 (39.4)                | 16342 (33.2)              | 2369 (42.2)         | 3394 (44.4)              | 22623 (34.0)              |
| Obese                                             | 1416 (19.5)                 | 5600 (24.0)                | 4746 (9.63)               | 1249 (22.3)         | 1867 (24.4)              | 8646 (13.0)               |
| <b>Physical activity</b>                          |                             |                            |                           |                     |                          |                           |
| Active                                            | 2762 (37.3)                 | 8105 (34.2)                | 22172 (44.5)              | 1928 (34.0)         | 2530 (32.7)              | 28581 (42.3)              |
| Moderate                                          | 2502 (33.8)                 | 8222 (34.6)                | 16514 (33.1)              | 1918 (33.8)         | 2658 (34.3)              | 22662 (33.5)              |
| Inactive                                          | 2134 (28.9)                 | 7406 (31.2)                | 11171 (22.4)              | 1831 (32.3)         | 2559 (33.0)              | 16321 (24.2)              |
| <b>Alcohol consumption</b>                        |                             |                            |                           |                     |                          |                           |
| Moderate                                          | 5256 (70.9)                 | 16522 (69.4)               | 36482 (73.0)              | 3996 (70.2)         | 5333 (68.7)              | 48931 (72.2)              |
| None                                              | 1042 (14.1)                 | 3925 (16.5)                | 7140 (14.3)               | 843 (14.8)          | 1369 (17.6)              | 9895 (14.6)               |
| High                                              | 1118 (15.1)                 | 3376 (14.2)                | 6376 (12.8)               | 852 (15.0)          | 1065 (13.7)              | 8953 (13.2)               |
| <b>Smoking</b>                                    |                             |                            |                           |                     |                          |                           |
| Never                                             | 4711 (64.8)                 | 16 047(68.6)               | 33607 (68.6)              | 3655 (65.7)         | 5319 (69.4)              | 45391 (68.3)              |
| Former                                            | 1458 (20.1)                 | 4572 (19.5)                | 8578 (17.5)               | 1107 (19.9)         | 1466 (19.1)              | 12035 (18.1)              |
| Current                                           | 1099 (15.1)                 | 2780 (11.9)                | 6823 (13.9)               | 798 (14.4)          | 875 (11.4)               | 9029 (13.6)               |
| <b>Number of unhealthy lifestyles*</b>            |                             |                            |                           |                     |                          |                           |
| 0                                                 | 3414 (45.8)                 | 10707 (44.8)               | 28299 (56.3)              | 2489 (43.5)         | 3446 (44.2)              | 36485 (53.6)              |
| 1–2                                               | 3746 (50.3)                 | 12245 (51.2)               | 20925 (41.7)              | 2990 (52.2)         | 4023 (51.6)              | 29903 (43.9)              |
| 3–4                                               | 293 (3.9)                   | 969 (4.1)                  | 1013 (2.0)                | 245 (4.3)           | 327 (4.2)                | 1703 (2.5)                |
| <b>History of antihypertensive medication use</b> | NA                          | 23 992 (100)               | NA                        | 2514 (43.8)         | 4907 (62.7)              | 16571 (24.3)              |
| <b>History of statin use</b>                      | 566 (7.6)                   | 4907 (20.5)                | 2356 (4.7)                | NA                  | 7829 (100.0)             | NA                        |
| <b>Diabetes</b>                                   | 203 (2.7)                   | 1602 (6.7)                 | 428 (0.9)                 | 330 (5.8)           | 1090 (13.9)              | 813 (1.2)                 |

Numbers are No. (%) unless otherwise specified. NA=not applicable; SD=standard deviation.

\*obesity, physical inactivity, high alcohol consumption, and current smoking.

**Table S10. Changes in body mass index, alcohol consumption, and physical activity from baseline survey to the second survey wave among users of preventive medication versus non-initiators, by baseline year.**

| Lifestyle factor<br>/User group           | Outcome               |                                     | Mean<br>change<br>( <i>P</i> value) | $\beta$ value (95% CI)<br>Unadjusted<br>difference | Adjusted<br>difference <sup>†</sup> |
|-------------------------------------------|-----------------------|-------------------------------------|-------------------------------------|----------------------------------------------------|-------------------------------------|
|                                           | Mean (SD)<br>Baseline | Mean (SD)<br>2 <sup>nd</sup> survey |                                     |                                                    |                                     |
| <b>Baseline in 2000/02</b>                |                       |                                     |                                     |                                                    |                                     |
| <b>Body mass index (kg/m<sup>2</sup>)</b> |                       |                                     |                                     |                                                    |                                     |
| Initiators<br>(n=2318)                    | 26.2 (4.12)           | 26.8 (4.37)                         | 0.56<br>( <i>&lt;.001</i> )         | 0.17 (0.11–0.25)                                   | 0.21 (0.14–0.29)                    |
| Prevalent users<br>(n=4699)               | 26.7 (4.42)           | 27.1 (4.62)                         | 0.44<br>( <i>&lt;.001</i> )         | 0.06 (0.004–0.11)                                  | 0.12 (0.06–0.18)                    |
| Non-initiators<br>(n=13 256)              | 24.7 (3.58)           | 25.1 (3.72)                         | 0.38<br>( <i>&lt;.001</i> )         | Reference                                          | Reference                           |
| <b>Physical activity (MET-hours/day)</b>  |                       |                                     |                                     |                                                    |                                     |
| Initiators<br>(n=2352)                    | 4.09 (3.70)           | 3.88 (3.44)                         | -0.21<br>(.01)                      | -0.30 (-0.47–[-0.13])                              | -0.27 (-0.49–[-0.09])               |
| Prevalent users<br>(n=4827)               | 3.73 (3.43)           | 3.72 (3.36)                         | -0.01<br>(0.80)                     | -0.10 (-0.23–0.04)                                 | -0.06 (-0.17–0.08)                  |
| Non-initiators<br>(n=13 491)              | 4.58 (4.00)           | 4.64 (4.03)                         | 0.06<br>(.07)                       | Reference                                          | Reference                           |
| <b>Alcohol consumption (grams/week)</b>   |                       |                                     |                                     |                                                    |                                     |
| Initiators<br>(n=2376)                    | 67.3 (101)            | 69.3 (108)                          | 2.01<br>(0.28)                      | -2.11 (-5.88–1.66)                                 | -1.61 (-5.48–2.26)                  |
| Prevalent users<br>(n=4883)               | 64.8 (103)            | 69.6 (117)                          | 4.77<br>(.003)                      | 0.16 (-2.65–2.98)                                  | 0.63 (-2.38–3.63)                   |
| Non-initiators<br>(n=13 574)              | 60.1 (88.4)           | 63.8 (98.2)                         | 3.72<br>( <i>&lt;.001</i> )         | Reference                                          | Reference                           |
| <b>Baseline in 2004/05</b>                |                       |                                     |                                     |                                                    |                                     |
| <b>Body mass index (kg/m<sup>2</sup>)</b> |                       |                                     |                                     |                                                    |                                     |
| Initiators<br>(n=3541)                    | 26.3 (4.16)           | 26.9 (4.46)                         | 0.61<br>( <i>&lt;.001</i> )         | 0.16 (0.10–0.23)                                   | 0.24 (0.17–0.31)                    |
| Prevalent users<br>(n=8048)               | 27.0 (4.54)           | 27.4 (4.74)                         | 0.40<br>( <i>&lt;.001</i> )         | -0.03 (-0.08–0.02)                                 | 0.13 (0.08–0.18)                    |
| Non-initiators<br>(n=14 485)              | 24.8 (3.64)           | 25.3 (3.84)                         | 0.45<br>( <i>&lt;.001</i> )         | Reference                                          | Reference                           |
| <b>Physical activity (MET-hours/day)</b>  |                       |                                     |                                     |                                                    |                                     |
| Initiators<br>(n=3623)                    | 4.16 (3.71)           | 3.81 (3.93)                         | -0.35<br>( <i>&lt;.001</i> )        | 0.04 (-0.10–0.18)                                  | 0.04 (-0.10–0.19)                   |
| Prevalent users<br>(n=8299)               | 3.88 (3.43)           | 3.52 (3.24)                         | -0.37<br>( <i>&lt;.001</i> )        | 0.02 (-0.08–0.13)                                  | 0.02 (-0.09–0.14)                   |
| Non-initiators<br>(n=14 852)              | 4.85 (4.00)           | 4.47 (3.84)                         | -0.38<br>( <i>&lt;.001</i> )        | Reference                                          | Reference                           |
| <b>Alcohol consumption (grams/week)</b>   |                       |                                     |                                     |                                                    |                                     |
| Initiators<br>(n=3651)                    | 69.3 (110)            | 64.9 (107)                          | -4.40<br>(.01)                      | -3.53 (-6.80–[-0.26])                              | -2.76 (-6.11–0.59)                  |
| Prevalent users<br>(n=8353)               | 68.0 (107)            | 65.3 (112)                          | -2.61<br>(.01)                      | -1.38 (-3.81–1.04)                                 | 0.17 (-2.47–2.78)                   |
| Non-initiators<br>(n=14 915)              | 63.4 (98.8)           | 61.7 (95.3)                         | -1.66<br>(.02)                      | Reference                                          | Reference                           |

*Continued*

| Lifestyle factor<br>/User group           | Outcome               |                                     | Mean<br>change<br>( <i>P</i> value) | β value (95% CI)          |                         |
|-------------------------------------------|-----------------------|-------------------------------------|-------------------------------------|---------------------------|-------------------------|
|                                           | Mean (SD)<br>Baseline | Mean (SD)<br>2 <sup>nd</sup> survey |                                     | Unadjusted<br>difference* | Adjusted<br>difference† |
| <b>Baseline in 2008/09</b>                |                       |                                     |                                     |                           |                         |
| <b>Body mass index (kg/m<sup>2</sup>)</b> |                       |                                     |                                     |                           |                         |
| Initiators<br>(n=2566)                    | 26.4 (4.31)           | 26.8 (4.51)                         | 0.37<br>( <i>&lt;.001</i> )         | 0.06 (-0.02–0.14)         | 0.11 (0.04–0.19)        |
| Prevalent users<br>(n=12 601)             | 27.2 (4.69)           | 27.4 (4.80)                         | 0.22<br>( <i>&lt;.001</i> )         | -0.08 (-0.13–[-0.04])     | 0.04 (-0.01–0.09)       |
| Non-initiators<br>(n=16 350)              | 25.0 (3.82)           | 25.3 (3.99)                         | 0.30<br>( <i>&lt;.001</i> )         | Reference                 | Reference               |
| <b>Physical activity (MET-hours/day)</b>  |                       |                                     |                                     |                           |                         |
| Initiators<br>(n=2683)                    | 4.05 (3.80)           | 4.16 (4.31)                         | 0.11<br>(.13)                       | -0.15 (-0.31–0.002)       | -0.13 (-0.29–0.03)      |
| Prevalent users<br>(n=13 242)             | 3.73 (3.42)           | 3.78 (3.48)                         | 0.06<br>(.06)                       | -0.21 (-0.30–[-0.13])     | -0.17 (-0.27–[-0.07])   |
| Non-initiators<br>(n=16 969)              | 4.64 (3.86)           | 4.89 (4.16)                         | 0.24<br>( <i>&lt;.001</i> )         | Reference                 | Reference               |
| <b>Alcohol consumption (grams/week)</b>   |                       |                                     |                                     |                           |                         |
| Initiators<br>(n=2694)                    | 69.4 (116)            | 64.6 (113)                          | -4.80<br>(.01)                      | -2.04 (-5.71–1.64)        | -1.48 (-5.24–2.27)      |
| Prevalent users<br>(n=13 309)             | 65.4 (111)            | 60.6 (109)                          | -4.86<br>(.040)                     | -2.80 (-4.86–[-0.75])     | -2.04 (-4.30–0.21)      |
| Non-initiators<br>(n=16 999)              | 59.9 (92.0)           | 57.2 (93.7)                         | -2.68<br>( <i>&lt;.001</i> )        | Reference                 | Reference               |

CI=confidence interval, MET=metabolic equivalent of task, SD=standard deviation.

\* adjusted for time interval between the survey waves.

† adjusted for time interval, age, sex, marital, occupational, and employment status, diabetes, smoking status and other lifestyle factors at baseline.

**Table S11. Odds ratios for obesity, physical inactivity, high alcohol consumption and current smoking at the second survey wave for users of preventive medication (versus non-initiators) stratified by presence of the respective unhealthy lifestyle at baseline, by baseline year.**

| Baseline<br>(wave 1)                       | Initiators                |                                      | Prevalent users                        |                                      | Non-<br>initiators |
|--------------------------------------------|---------------------------|--------------------------------------|----------------------------------------|--------------------------------------|--------------------|
|                                            | Unadjusted<br>OR (95% CI) | Adjusted <sup>†</sup><br>OR (95% CI) | Unadjusted <sup>†</sup><br>OR (95% CI) | Adjusted <sup>†</sup><br>OR (95% CI) | Ref.               |
| <b>Baseline in 2000/02</b>                 |                           |                                      |                                        |                                      |                    |
| <b>Obesity</b>                             |                           |                                      |                                        |                                      |                    |
| Yes                                        | 1.71 (1.20–2.42)          | 1.62 (1.13–2.31)                     | 1.74 (1.35–2.24)                       | 1.57 (1.21–2.05)                     | 1.00               |
| No                                         | 1.96 (1.59–2.41)          | 1.97 (1.59–2.43)                     | 1.99 (1.69–2.34)                       | 2.05 (1.73–2.43)                     | 1.00               |
| <b>Physical inactivity</b>                 |                           |                                      |                                        |                                      |                    |
| Yes                                        | 1.37 (1.15–1.64)          | 1.24 (1.03–1.50)                     | 1.41 (1.24–1.61)                       | 1.25 (1.09–1.44)                     | 1.00               |
| No                                         | 1.27 (1.11–1.46)          | 1.06 (0.92–1.23)                     | 1.45 (1.31–1.61)                       | 1.20 (1.07–1.34)                     | 1.00               |
| <b>High alcohol consumption</b>            |                           |                                      |                                        |                                      |                    |
| Yes                                        | 1.17 (0.91–1.51)          | 1.12 (0.86–1.46)                     | 1.06 (0.87–1.28)                       | 0.98 (0.79–1.20)                     | 1.00               |
| No                                         | 1.07 (0.89–1.30)          | 1.13 (0.93–1.37)                     | 1.12 (0.97–1.29)                       | 1.23 (1.06–1.43)                     | 1.00               |
| <b>Current smoking</b>                     |                           |                                      |                                        |                                      |                    |
| Yes                                        | 0.60 (0.46–0.78)          | 0.59 (0.45–0.78)                     | 0.81 (0.64–1.03)                       | 0.80 (0.62–1.02)                     | 1.00               |
| No                                         | 0.46 (0.28–0.75)          | 0.49 (0.29–0.82)                     | 0.78 (0.58–1.04)                       | 0.95 (0.69–1.30)                     | 1.00               |
| <b>Cluster of 3–4 unhealthy lifestyles</b> |                           |                                      |                                        |                                      |                    |
| Yes                                        | 1.36 (0.84–2.21)          | 1.41 (0.86–2.31)                     | 1.54 (1.05–1.90)                       | 1.44 (0.96–2.16)                     | 1.00               |
| No                                         | 1.60 (1.16–2.20)          | 1.67 (1.21–2.32)                     | 1.64 (1.28–2.10)                       | 1.81 (1.40–2.35)                     | 1.00               |
| <b>Baseline in 2004/05</b>                 |                           |                                      |                                        |                                      |                    |
| <b>Obesity</b>                             |                           |                                      |                                        |                                      |                    |
| Yes                                        | 1.25 (0.94–1.66)          | 1.33 (1.00–1.77)                     | 1.39 (1.13–2.24)                       | 1.56 (1.25–1.96)                     | 1.00               |
| No                                         | 1.80 (1.53–2.12)          | 1.78 (1.51–2.10)                     | 1.73 (1.52–1.97)                       | 1.77 (1.55–2.03)                     | 1.00               |
| <b>Physical inactivity</b>                 |                           |                                      |                                        |                                      |                    |
| Yes                                        | 1.13 (0.98–1.31)          | 1.01 (0.87–1.18)                     | 1.44 (1.29–1.61)                       | 1.20 (1.06–1.35)                     | 1.00               |
| No                                         | 1.37 (1.23–1.53)          | 1.17 (1.04–1.30)                     | 1.49 (1.38–1.62)                       | 1.19 (1.09–1.30)                     | 1.00               |
| <b>High alcohol consumption</b>            |                           |                                      |                                        |                                      |                    |
| Yes                                        | 0.88 (0.72–1.06)          | 0.91 (0.74–1.11)                     | 1.07 (0.92–1.24)                       | 1.15 (0.98–1.36)                     | 1.00               |
| No                                         | 1.03 (0.87–1.21)          | 1.09 (0.92–1.30)                     | 0.92 (0.81–1.05)                       | 1.10 (0.96–1.26)                     | 1.00               |
| <b>Current smoking</b>                     |                           |                                      |                                        |                                      |                    |
| Yes                                        | 0.78 (0.63–0.96)          | 0.74 (0.59–0.93)                     | 0.92 (0.78–1.10)                       | 0.90 (0.75–1.09)                     | 1.00               |
| No                                         | 1.13 (0.82–1.58)          | 1.21 (0.86–1.71)                     | 0.96 (0.74–1.24)                       | 1.18 (0.89–1.56)                     | 1.00               |
| <b>Cluster of 3–4 unhealthy lifestyles</b> |                           |                                      |                                        |                                      |                    |
| Yes                                        | 1.24 (0.81–1.89)          | 1.16 (0.75–1.79)                     | 1.42 (1.03–1.97)                       | 1.29 (0.90–1.83)                     | 1.00               |
| No                                         | 1.45 (1.11–1.94)          | 1.53 (1.15–2.03)                     | 1.71 (1.39–2.10)                       | 1.88 (1.51–2.34)                     | 1.00               |
| <b>Baseline in 2008/09</b>                 |                           |                                      |                                        |                                      |                    |
| <b>Obesity</b>                             |                           |                                      |                                        |                                      |                    |
| Yes                                        | 1.24 (0.93–1.65)          | 1.25 (0.93–1.68)                     | 1.22 (1.04–1.44)                       | 1.25 (1.05–1.50)                     | 1.00               |
| No                                         | 1.76 (1.45–2.14)          | 1.76 (1.44–2.14)                     | 1.76 (1.56–1.98)                       | 1.83 (1.61–2.43)                     | 1.00               |
| <b>Physical inactivity</b>                 |                           |                                      |                                        |                                      |                    |
| Yes                                        | 1.40 (1.20–1.64)          | 1.28 (1.09–1.51)                     | 1.46 (1.34–1.60)                       | 1.22 (1.10–1.35)                     | 1.00               |
| No                                         | 1.26 (1.11–1.44)          | 1.03 (0.90–1.18)                     | 1.52 (1.41–1.63)                       | 1.16 (1.07–1.25)                     | 1.00               |
| <b>High alcohol consumption</b>            |                           |                                      |                                        |                                      |                    |
| Yes                                        | 1.10 (0.88–1.37)          | 1.11 (0.89–1.39)                     | 0.97 (0.85–1.09)                       | 0.97 (0.85–1.12)                     | 1.00               |
| No                                         | 0.97 (0.79–1.18)          | 1.00 (0.81–1.22)                     | 1.07 (0.96–1.19)                       | 1.19 (1.06–1.34)                     | 1.00               |

| Baseline<br>(wave 1)                       | Initiators                |                                      | Prevalent users                        |                                      | Non-<br>initiators |
|--------------------------------------------|---------------------------|--------------------------------------|----------------------------------------|--------------------------------------|--------------------|
|                                            | Unadjusted<br>OR (95% CI) | Adjusted <sup>†</sup><br>OR (95% CI) | Unadjusted <sup>†</sup><br>OR (95% CI) | Adjusted <sup>†</sup><br>OR (95% CI) | Ref.               |
| <b>Current smoking</b>                     |                           |                                      |                                        |                                      |                    |
| Yes                                        | 0.86 (0.65–1.07)          | 0.86 (0.66–1.12)                     | 1.03 (0.88–1.22)                       | 1.07 (0.89–1.27)                     | 1.00               |
| No                                         | 1.14 (0.96–1.86)          | 1.35 (1.00–1.82)                     | 0.95 (0.79–1.14)                       | 1.15 (0.77–1.41)                     | 1.00               |
| <b>Cluster of 3–4 unhealthy lifestyles</b> |                           |                                      |                                        |                                      |                    |
| Yes                                        | 1.15 (0.72–1.82)          | 1.21 (0.75–1.95)                     | 1.31 (0.99–1.73)                       | 1.37 (1.01–1.85)                     | 1.00               |
| No                                         | 1.98 (1.46–2.69)          | 1.99 (1.46–2.71)                     | 1.89 (1.56–2.29)                       | 2.14 (1.73–2.64)                     | 1.00               |

CI=confidence interval, OR=odds ratio.

<sup>\*</sup> adjusted for baseline year and time interval between the survey waves.

<sup>†</sup> adjusted for baseline year, time interval, age, sex, marital, occupational, and employment status, diabetes, and other lifestyle factors at baseline (except for the cluster variable).

**Table S12. Changes in body mass index, physical activity, and alcohol consumption from the baseline survey to the 2nd survey wave among users of preventive medication (versus non-initiators), by sex.**

| Lifestyle factor /User group              | Outcome     |                        | Mean change (P value) | $\beta$ value (95% C) Unadjusted difference <sup>†</sup> | Adjusted difference <sup>‡</sup> |
|-------------------------------------------|-------------|------------------------|-----------------------|----------------------------------------------------------|----------------------------------|
|                                           | Baseline    | 2 <sup>nd</sup> survey |                       |                                                          |                                  |
| <b>Women</b>                              |             |                        |                       |                                                          |                                  |
| <b>Body mass index (kg/m<sup>2</sup>)</b> |             |                        |                       |                                                          |                                  |
| Initiators (n=6919)                       | 26.2 (4.29) | 26.7 (4.55)            | 0.57 (<.001)          | 0.14 (0.11–0.18)                                         | 0.20 (0.16–0.23)                 |
| Prevalent users (n=21,154)                | 26.9 (4.68) | 27.2 (4.81)            | 0.34 (<.001)          | -0.05 (-0.08–[-0.03])                                    | 0.07 (0.04–0.10)                 |
| Non-initiators (n=37 063)                 | 24.7 (3.74) | 25.1 (3.92)            | 0.40 (<.001)          | Reference                                                | Reference                        |
| <b>Physical activity (MET-hours/day)</b>  |             |                        |                       |                                                          |                                  |
| Initiators (n=7142)                       | 4.04 (3.61) | 3.88 (3.49)            | -0.17 (<.001)         | 0.001 (-0.07–0.07)                                       | -0.11 (-0.19–[-0.04])            |
| Prevalent users (n=22,082)                | 3.75 (3.34) | 3.66 (3.30)            | -0.09 (.003)          | -0.12 (-0.17–[-0.08])                                    | -0.09 (-0.13–[-0.04])            |
| Non-initiators (n=38 157)                 | 4.60 (3.86) | 4.60 (3.89)            | 0.003 (.87)           | Reference                                                | Reference                        |
| <b>Alcohol consumption (grams/week)</b>   |             |                        |                       |                                                          |                                  |
| Initiators (n=7200)                       | 52.9 (87.5) | 50.6 (82.3)            | -2.27 (.02)           | -2.42 (-4.98–[-0.86])                                    | -1.76 (-3.40–[-0.12])            |
| Prevalent users (n=22,231)                | 50.9 (86.5) | 48.7 (86.7)            | -2.26 (<.001)         | -1.52 (-2.54–[-0.50])                                    | -0.95 (-2.08–0.18)               |
| Non-initiators (n=38 327)                 | 49.5 (77.8) | 49.2 (80.8)            | -0.29 (0.44)          | Reference                                                | Reference                        |
| <b>Men</b>                                |             |                        |                       |                                                          |                                  |
| <b>Body mass index (kg/m<sup>2</sup>)</b> |             |                        |                       |                                                          |                                  |
| Initiators (n=1506)                       | 26.9 (3.67) | 27.3 (3.95)            | 0.32 (<.001)          | 0.09 (0.02–0.18)                                         | 0.15 (0.07–0.23)                 |
| Prevalent users (n=4194)                  | 27.7 (4.11) | 28.0 (4.37)            | 0.22 (<.001)          | 0.05 (-0.01–0.11)                                        | 0.14 (0.09–0.20)                 |
| Non-initiators (n=7028)                   | 25.7 (3.33) | 25.9 (3.45)            | 0.21 (<.001)          | Reference                                                | Reference                        |
| <b>Physical activity (MET-hours/day)</b>  |             |                        |                       |                                                          |                                  |
| Initiators (n=1516)                       | 4.41 (4.26) | 4.25 (4.01)            | -0.16 (.14)           | 0.001 (-0.19–0.19)                                       | 0.01 (-0.19–0.20)                |
| Prevalent users (n=4286)                  | 3.91 (3.86) | 3.80 (3.80)            | -0.11 (.06)           | -0.05 (-0.17–0.06)                                       | -0.07 (-0.20–0.07)               |
| Non-initiators (n=7155)                   | 5.19 (4.72) | 5.09 (4.65)            | -0.10 (.05)           | Reference                                                | Reference                        |
| <b>Alcohol consumption (grams/week)</b>   |             |                        |                       |                                                          |                                  |
| Initiators (n=1521)                       | 144 (161)   | 139 (166)              | -5.17 (.16)           | -3.17 (-9.15–2.82)                                       | -2.05 (-8.29–4.19)               |
| Prevalent users (n=4315)                  | 144 (162)   | 141 (174)              | -3.01 (.18)           | -1.37 (-5.28–2.55)                                       | 0.24 (-4.09–4.58)                |
| Non-initiators (n=7161)                   | 123 (135)   | 122 (137)              | 1.12 (.37)            | Reference                                                | Reference                        |

CI=confidence interval; MET=metabolic equivalent of task; SD=standard deviation.

\* SDs and *P* values reported here do not take into account that each participant may have contributed to more than one dataset.

† adjusted for baseline year and time interval between the survey waves. ‡ adjusted for baseline year, time interval, age, sex, marital, occupational, and employment status, diabetes, smoking status and other lifestyle factors at baseline.

**Table S13. Odds ratios for obesity, physical inactivity, high alcohol consumption and current smoking at the second survey wave for users of preventive medication (versus non-initiators) stratified by presence of the respective unhealthy lifestyle at baseline, by sex.**

| Baseline (wave 1)                          | Initiators                             |                                      | Prevalent users                       |                                      | Non-initiators |
|--------------------------------------------|----------------------------------------|--------------------------------------|---------------------------------------|--------------------------------------|----------------|
|                                            | Unadjusted <sup>*</sup><br>OR (95% CI) | Adjusted <sup>†</sup><br>OR (95% CI) | Unadjusted <sup>*</sup><br>OR (95%CI) | Adjusted <sup>†</sup><br>OR (95% CI) | Reference      |
| <b>Women</b>                               |                                        |                                      |                                       |                                      |                |
| <b>Obesity</b>                             |                                        |                                      |                                       |                                      |                |
| Yes                                        | 1.34 (1.08–1.68)                       | 1.41 (1.15–1.73)                     | 1.30 (1.15–1.47)                      | 1.33 (1.16–1.53)                     | 1.00           |
| No                                         | 1.78 (1.51–2.13)                       | 1.84 (1.62–2.08)                     | 1.79 (1.64–1.95)                      | 1.82 (1.66–1.99)                     | 1.00           |
| <b>Physical inactivity</b>                 |                                        |                                      |                                       |                                      |                |
| Yes                                        | 1.32 (1.19–1.46)                       | 1.20 (1.08–1.32)                     | 1.43 (1.33–1.53)                      | 1.21 (1.13–1.30)                     | 1.00           |
| No                                         | 1.33 (1.11–1.55)                       | 1.10 (1.00–1.22)                     | 1.49 (1.41–1.57)                      | 1.17 (1.10–1.24)                     | 1.00           |
| <b>High alcohol consumption</b>            |                                        |                                      |                                       |                                      |                |
| Yes                                        | 1.01 (0.87–1.17)                       | 1.01 (0.86–1.19)                     | 1.05 (0.94–1.17)                      | 1.04 (0.93–1.16)                     | 1.00           |
| No                                         | 0.97 (0.87–1.09)                       | 1.04 (0.93–1.18)                     | 0.99 (0.92–1.07)                      | 1.17 (1.07–1.27)                     | 1.00           |
| <b>Current smoking</b>                     |                                        |                                      |                                       |                                      |                |
| Yes                                        | 0.75 (0.64–0.89)                       | 0.75 (0.63–0.89)                     | 0.93 (0.83–1.06)                      | 0.93 (0.81–1.06)                     | 1.00           |
| No                                         | 0.98 (0.78–1.24)                       | 1.01 (0.79–1.29)                     | 0.93 (0.80–1.08)                      | 1.16 (0.98–1.37)                     | 1.00           |
| <b>Cluster of 3–4 unhealthy lifestyles</b> |                                        |                                      |                                       |                                      |                |
| Yes                                        | 1.15 (0.83–1.61)                       | 1.17 (0.83–1.64)                     | 1.27 (1.02–1.58)                      | 1.24 (0.97–1.60)                     | 1.00           |
| No                                         | 1.65 (1.34–2.03)                       | 1.75 (1.40–2.17)                     | 1.74 (1.51–2.01)                      | 2.01 (1.73–2.33)                     | 1.00           |
| <b>Men</b>                                 |                                        |                                      |                                       |                                      |                |
| <b>Obesity</b>                             |                                        |                                      |                                       |                                      |                |
| Yes                                        | 1.21 (0.83–1.76)                       | 1.20 (0.80–1.91)                     | 1.82 (1.67–1.98)                      | 1.70 (1.24–2.33)                     | 1.00           |
| No                                         | 1.78 (1.20–2.64)                       | 1.76 (1.36–2.29)                     | 1.80 (1.49–2.19)                      | 1.78 (1.44–2.20)                     | 1.00           |
| <b>Physical inactivity</b>                 |                                        |                                      |                                       |                                      |                |
| Yes                                        | 1.13 (0.90–1.40)                       | 1.01 (0.81–1.26)                     | 1.49 (1.28–1.74)                      | 1.24 (1.04–1.46)                     | 1.00           |
| No                                         | 1.29 (1.10–1.53)                       | 1.09 (0.91–1.30)                     | 1.53 (1.35–1.74)                      | 1.23 (1.08–1.40)                     | 1.00           |
| <b>High alcohol consumption</b>            |                                        |                                      |                                       |                                      |                |
| Yes                                        | 1.02 (0.81–1.28)                       | 1.03 (0.81–1.31)                     | 0.95 (0.81–1.12)                      | 1.00 (0.84–1.20)                     | 1.00           |
| No                                         | 1.17 (0.95–1.44)                       | 1.13 (0.90–1.42)                     | 1.17 (1.02–1.34)                      | 1.16 (0.98–1.36)                     | 1.00           |
| <b>Current smoking</b>                     |                                        |                                      |                                       |                                      |                |
| Yes                                        | 0.70 (0.52–0.94)                       | 0.68 (0.51–0.90)                     | 0.99 (0.78–1.25)                      | 0.94 (0.72–1.21)                     | 1.00           |
| No                                         | 1.13 (0.75–1.69)                       | 1.15 (0.76–1.74)                     | 0.80 (0.57–1.10)                      | 0.96 (0.69–1.34)                     | 1.00           |
| <b>Cluster of 3–4 unhealthy lifestyles</b> |                                        |                                      |                                       |                                      |                |
| Yes                                        | 1.45 (0.91–2.31)                       | 1.57 (0.95–2.60)                     | 1.75 (1.24–2.46)                      | 1.81 (1.23–2.65)                     | 1.00           |
| No                                         | 1.48 (1.07–2.06)                       | 1.58 (1.13–2.21)                     | 1.92 (1.56–2.36)                      | 1.93 (1.52–2.44)                     | 1.00           |

OR=odds ratio; CI=confidence interval.

\* adjusted for baseline year and time interval between the survey waves.

† adjusted for baseline year and time interval, age, marital, occupational, and employment status, diabetes, and other lifestyle factors (except for the cluster variable)
